# Supplementary material
Source: PubMed Central journal article supplement (PMC4330575)
Supplement: supp_tpc.114.132753_tpc132753_SupplementalFig1.pdf [file supp_tpc.114.132753_tpc132753_SupplementalFig1.pdf]

..... **β1** **α2** ..... **β2** ..... **β3** .....

ARF5.....CLPQVGSIVVYFVSQGHSEQVAVSTRRS.....ATTQVPNYPNLPSQLMCQVHNVTLHADKDSDEIYAQMSLQPV  
 ARF6.....SLPPVGSRVVYFPQGHSEQVAASTNKE.....VDAHIPNYPSLHPQLICQLHNVTMHADVETDEVYAQMTLQPL  
 ARF7.....SLPPAGSLVVYFPQGHSEQVAASMOKQ.....TDFIPSYPNLPSKLICMLHNVTLNADPETDEVYAQMTLQPV  
 ARF1.....TLPREGERVYFPEGHMEQLEASMHQG.....LEQQMPSE.NLPSKILCKVINIQRAEPETDEVYAQITLLPE  
 ARF9.....DVPOAQERVYFVPQGHMEQLEASTQV.....DLNNTMKLEF.VLPPKILCNVMNVSILQAEKDTDEVYAQITLIPV  
 ARF3.....SLPKRGSIVLYFVPQGHLEQAPDFSAAI.....Y.GLPPHVFCRILLVKLHAETTTDEVYAQVSLLEPE  
 ARF10....QIPSLNSTVFYFAQGHTEHAHAPPDFH.....APRVPLILCRVVSVKFLADAETDEVFAKITLLPL  
 PpARF1...QLPQVGAKVLYFVPQGHGEQAATTPDFS.....ASMGPSGTIPCRVVSVMFLADTETDEVFARMRLQPE  
 PpARF2...QLPHVGAKVVYFPQGHGEQAASTPEFP.....RTLVPNGSVPCRVSVMFLADTETDEVFARICLQPE  
 SmARF1...QLPPVGAKVLYFVPQGHGEQAAAIPDFP.....RSGGTILCRVISVDFLADAETDEVYAKMKLQPE  
 SmARF2...QLPTVGSKIIYFVPQGHAEQAASSPDFP.....RALGPAGTVPCRVLVSKFLADKETDEVFASLRLEPE  
 PpBRWD...YSPQFGDEVAYLHQGHREYLEASKVKE.....KGPWKKHE.LRAVEFCRITNLEYHIEPGGT.SCKLELEFL  
 DfBRWD...YIPQIGDNVLYFHQGHKKYLDMPDEVV.....QDVGLSLLWLSTAEECIIKELKYIITSPOSSNPLHQQAQIT  
 PopBRWD..YSPQIGDSVLYFHQGHKKYIETFPDETE.....QVEQSQLSTAEECNLIINIKYIIASPKSVNPLHQAEIT  
 AcBRWD...YIPQVNDVVYFRQGHSHIEKFAKVQ.....HPTPPWETFPRLRAQEVCRVVOIEYRPSYGIQTLLTLELLDT  
 AiBRWD...LIPQVGDITLMYCPQGHVEVFLRSFPSKF.....QAAYKSLPKPFAVLQCHVLDIQYTFPPVDLYPQQNRIVMEL  
 CcBRWD...SSPQLGDDVMYFPEGHASAM.AISRET.....GVEPVAGLAALKKAGKELDGSFPADASPVRFOIVQKPRSASS  
 MmPHIP...FVPQMGDEVYFVRQGHHEAYVEMARKNKIYSINPKKQPHW..KMEIREQELMKIVGIRYEVGLPTL..CC.LKLAFL  
 HsWDR9...FVPQMGDEVYFVRQGHHEAYIEAVRRNNIYELNPNKEPWR..KMDLRDQELVKIVGIRYEVGPPIT..SCKLELEFL  
 DmWDR9...YVPQMGDEVYFVRQGHAKYLDVAVRLKKVYKLSHSEPNW..FHTLRDHELVRVIGIRYEVIRPRL..CC.LKLAII  
 GmBRWD...YIPQLGDEVYFVRQGHQEYIESYSLSE.....SGPWRLFVGLGASEICKVEELEYAELPGSGDSCCKLKLRFV  
 AtBRWD...YIPQMGDEVAYLFRQGHQEYLNFSLSRE.....VAPWTSIKGGNIKAVEICKVESLEYATLPGSGDSCCKMILKVI  
 TgCRM....QLPEVGSRLFYFRKGHEQMMKSMQQE-----

ARF5.....HSEKRVDFVFPDFGMLRGSK\*HQQTAL.....  
 ARF6.....NAQEOKDPYLPALGVPSR\*QRPOQTM.....  
 ARF7.....NKYDRDALLASDMGLKLNK\*QANRQTPTL.....  
 ARF1.....LPTS PDAPVQEPEK\*ROQTNI.....  
 ARF9.....GTEVDEPMSPDPSPELQR\*LQQSSM.....  
 ARF3...SEDIERKRVREGIIDVDGGEEDYEVVKRSN\*QIEGTA.....  
 ARF10..PGNDLDLENDAVLGLTPPSSDGNNGKKEK\*RGGLGSNAGSDNPYPGFSGFLRDEESTTTTSSKLMMMKRNGNN.....  
 PpARF1.....GLHGLNDMTEEAPSSPPEK\*RGAMGDNGHGS.SNGVSRSGSQGASTT.....  
 PpARF2.....IGSSAQDLTDDSLASPPLEK\*RGVSNGESSS..WHSSISNASTIRPSRWEVKGTESFSDFLGG.VGDNGYALNT..  
 SmARF1...VAPAPLFGTRMGDDEELVSSPTVVEK\*RGPGNGDSG.ISWHSSPGQSGYSELLSGNGSGTSG.....  
 SmARF2.....SGSDEDNDRAAALSPEK\*RGGGSGNADALLWHSASRSSH...SRWELRPPMDTGLSDGTLMGENGSSRSAG  
 PpBRWD...DMESSASG.....  
 DfBRWD..LKPVS SPDEE.....  
 PpBRWD..LSVLSTG.....  
 AcBRWD..LVPPSPSMLGEDESYPEEESLNAN.....  
 AiBRWD..IMDVVGLPSVYFRNEDDQPSVDVLDVFGSFVPMNNLFRDESEARRK.....  
 CcBRWD..RPKASRGSHVHNRVTAKTTLVLTTLRLVSGLPSRTDGA.....  
 MmPHIP..DPDTGKLTG.....  
 HsWDR9..DMESSASG.....  
 DmWDR9..DEEEGNMTG.....  
 GmBRWD..DPSSCVHG.....  
 AtBRWD..DPNSEVFN.....  
 TgCTM...-----

..... **α6** **β11** **β12** **α7** **β13** .....

ARF5.....PSSVLSADSMHIGVLA AAAAHATA NRTPFLIFYNPRACP AEFV I PLAKYRKAICGSQLSVGMRF GMMFET.....

ARF6.....PSSVLSSDSMHLG LLA AAAAHAAATNSRFTIFYNPRASPSEFV I PLAKYVKAVYHTRVSVGMRF RRM LFET.....

ARF7.....SSSVISSDSMHIG I LLA AAAAHANANSSPFTIFFNPRASPSEFV V PLAKYNKALYA.QVSLGMRF RRM LFET.....

ARF1.....PSSVISSHSMHIGV LATAAHAIT TGTIFSVFYKPRTSRSEFIVSVNRYLEAKTQ.KLSVGMRFKMRFE G.....

ARF9.....PSSVISSHSMHIGV LATA RHATQT KTMFIVYYKPRT..SQFIISLNKYLEAMSN.KFSVGMRFKMRFE G.....

ARF3.....ALSAQYNQNMHN NFSEVAHAISTHSVFSISYNPKASWSNFIIPAPKFLKVV DY.PFCIGMRFKARVES.....

ARF10.....DGNAAATGRVRVEA VAEAVARAACGQAFEVVYYPRASTPEFCVKAADVRSAMRI.RWCSGMRFKMAFET.....

PpARF1.....SSFARNRARVTAKS VLDAAALAVAGK.PFEV VYYPRASTAEFCVKAGLVKQALDH.TWYAGMRFKMAFET.....

PpARF2.....SSFARDRARVTAKS VLEAAALAVSGE.RFEV VYYPRASTAEFCVKAGLVKRALEQ.SWYAGMRFKMAFET.....

SmARF1.....ASFARNRARVTSKS VLEAASLAAAGQ.AFEV VYYPRASTAEFCVRA SVVKASLEH.SWYPGMRFKMAFET.....

SmARF2...GGGGNGGGSFTRAKVTAKS VLDAA TLAA SGK.AFEV VYYPRASTAEFCVRAQTVRAALSH.GWYAGMRFKMAFET.....

PpBRWD.....YKFQLTWPELTDYDPDFLVEKSRFDASMAK.GWVARDHCKVWVWASEK G..

DfBRWD.....DEIKVFYH.VSDIPDYLV LASKVKRSLET.RWAPGMKFKMYYPD.....

PopBRWD.....HTISVLYH.VSDIPDYLV LASRVKRSLES.HWASDDQFKMFYID.....

AcBRWD.....RREMLSYPHTTRTVDFLV LRSRYESSLEA..CHVGRRVTVLFFSGKE..

AiBRWD.....WRFRLQHQPSEC.AEFL LLEQKYL SFGFQAPRWKVGATVQ MAYHTMDDHG

CcBRWD.....TRFVLCYYPVDAP.EYLV LTNRVEAALN.RAWTASDRFRILEFLN.....

MmPHIP.....GSFTMKYHDMPDVIDFLV LRQQFDDAKYR.RWNIGDRFRSVIDD.....

HsWDR9.....KSF SIRYHDMPDVIDFLV LRQFYDEARQR.NWQCDRFRSIIDD.....

DmWDR9.....TTFKIKYHDMPDVLDFLV LRQTFDLAVQR.NWSIGDRFRCMIVD.....

GmBRWD.....KSFKLTLP ELINFTDFVIEKTWYDTAMKR.NWSSRDCKM VVWRN.....

AtBRWD.....KAFKLTLP ELVTFPDLFV ERSRYEAAIQR.NWTCRDCKV VWRD.....

TgCRM.....-----394aa-----VEFVVRREKVFHALNL.NWNPGMRF RRMV FHT-----

Tudor.....FQINEQVLACW.....

..... **β14** **β15** **β16-η1-β17** .....

ARF5.....EDSG.KRRYMG TIVGISDLDP LRWPGSKWRNLQVEWDEPGC....NDKPTRVSPWDIE TPE

ARF6.....EESS.VRRYMG TITGICDLDP TRWANS HWRSVKVGVWDE STA....GERQPRVSLWEIEPLT

ARF7.....EECG.VRRYMG TIVGISDLDP VRWKN SQWRNLQIGWDE SAA....GDRPSRVSVWDIEPV L

ARF1.....EEAP.EKRESG TIVGVQENKSSVWHDSEWRSLKVQWDEPSS....VFRPERVSPWEIEPLV

ARF9.....EDSP.ERRYSG TIVGVKDCSPH.WKDSKWRCLEVHWDEPAS....ISRPNKVPSPWEIEPFV

ARF3.....EDAS.ERRSPGIISGISDLDP IRWPGSKWRCLLVRWDDIVA....NGHQQRVSPWEIEPSG

ARF10.....EDSSRISWFMGT VSAVQVADPIRWPNSPWRLLQVAWDEPDL....VQNVKRVSPWLVELVS

PpARF1.....EDSSRISWFMGT IAAVQPADP LLWPNSPWR...VTWDEPDL....LQGVSRVSPWQVELVA

PpARF2.....EDSSRISWFMGT IAAVQAADPVLWPSSPWRVLQVTWDEPDL....LQGVNRVSPWQLELVA

SmARF1.....EDSSRISWFMGT ISAVQPADPIRWPSSPWRILQVSWDEPDL....LQGVNRVSPWQVELVS

SmARF2.....EDSSRISWFMGT ISAVQAADPILWPSSPWRVLQVAWDEPDL....LQGVSRVSPWQVELVS

PpBRWD.....ADEKQWWDGRIKTIKAKSDD.FPDSPEKEYIVTYRESA....EPQAHSPWELFDRN

DfBRWD.....EEKWYNGRIKSIAPSDPN.YPDSLWERILVCWSQDGN....DDRVPSPWEIE LLLT

PopBRWD.....ENQWFTGVITEVSPSDPT.YPDSLWERIVVRWDQDGG....EGRVSPWEIE LVLH

AcBRWD...DGVSSRKSTTITDSVRQA AWYSGTVLSVSP LSPDTFPDSKWDCL EVAWDD EPGEPAGTGGVTRVSPWESKEYH

AiBRWD.....MIQNTQMDTKI LELSP LDP..AMTSPWECIVVQWENED....TPCRVSPWEIE LSDQ

CcBRWD.....ESAWQYGTI...RSVRP.TIRSVMWN SVEVVYDNEGE..KEKTTCEL VSPWEIE LSFH

MmPHIP.....AWWFGTIESQEPLQP.EYPDSLFCY NV CWDN....GDTEKMSPWDMELIP

HsWDR9.....AWWFGTVLSQE PYQPQ.YPDSHFQCYIVRWDN....TEKLSPWDMEP IP

DmWDR9.....GWWMGQIESRHAL SAD.FPDSSEMC FRVRWDN....YEFMSPWDMEP ID

GmBRWD.....EDGKGSWWDGRIIQVQAKSDD.FPNSPWEYR VQYKTDP....SENHLHSPWEL YDPE

AtBRWD.....EGEEDGSWWEGRILAVKPKSPD.FPDSPWEYR TVKYKSDP....AETHLHSPWEL F DAD

TgCRM.....-----80aa-----TRYTGTIRRVNLL....HPD.FWENVVVEWEDR---41aa---ENVSLWEIEPLK

Tudor.....SDCRFYPAKVTA VNKDG....TYTVKFYDGVV....QTVKHIHVKAF

**Supplemental Figure 1.** Amino acid sequence alignments for the BRWD-like fragment in selected Arabidopsis ARFs and BRWD proteins.

Identical amino acids are boxed in yellow and similar amino acids are boxed in grey. Secondary structures for ARFs (Boer et al., 2014) and predicted for BRWD proteins (Phyre2) are shown at approximate positions above the alignments. The Tudor domain (Boer et al., 2014) and another Auxin\_resp domain protein (TgCRM) are shown for comparison. Sequences for ARF5 (At1g19850), ARF6 (At1g30330), ARF7 (At5g20730), ARF1 (At1g59750), ARF9 (At4g23980), and ARF3 (At2g33860), PpARF1 and PpARF2: *Physcomitrella patens* (XP\_001782750 and DAA06632), SmARF1 and SmARF2: *Selaginella moellendorffii* (XP\_002969449 and XP\_002976921), PpBRWD: *Physcomitrella patens* (XP\_001755663), DfBRWD: *Dictyostelium fasciculatum* (XP\_004357233), PopBRWD: *Polysphondylium pallidum* (ADBJ01000037), AcBRWD: *Acanthamoeba castellanii* (XP\_004337512), AiBRWD: *Aphanomyces invadans* (gb ETW016454), CcBRWD: *Chondrus crispus* (XP\_005719095), MmPHIP: *Mus musculus* (gb EDL26451), HmWDR9: *Homo sapiens* (AB080587), DmWDR9: *Drosophila melanogaster* (AY094828), GmBRWD: *Glycine max* (XM\_006588511), AtBRWD: *Arabidopsis thaliana* (At5g49430), TgCRM: *Toxoplasma gondii* (XP\_002366434) chloroquine resistance marker protein, and Tudor: Tudor domain from *Homo sapiens* PHD-finger protein 20 (NP\_057520.2) are aligned. Asterisk is the position of the B3 domain in ARFs that has been excised from the alignment. The dashed lines in TgCRM show the number of amino acid residues between the conserved motifs that are found in ARFs or BRWD proteins. The FD<sub>1</sub>- related sequences are located within residues 3324-3359, and FD<sub>2</sub>-related sequences are located within residues 3744-3773, 3854-3881, and 3921-3934 of the TgCRM protein.
